# Supplementary material for: Meaning of living with severe chronic obstructive lung disease: a qualitative study
Source: PubMed Central journal article supplement — BMJ Open. 2016 Dec 8;6(12):e011555. doi: 10.1136/bmjopen-2016-011555 (PMC5168631; doi:10.1136/bmjopen-2016-011555), 2016-12-08
Supplement: bmjopen-2016-011555supp1.pdf [file bmjopen-2016-011555supp1.pdf]

## Transcription convention adopted in this study

### (The meaning of living with severe chronic obstructive lung disease: a qualitative study)

|                |                                                                                                                                  |
|----------------|----------------------------------------------------------------------------------------------------------------------------------|
| ,              | <i>Comma</i> : short brake, short pause (maximum one second)                                                                     |
| (3)            | <i>Parentheses with a number</i> : pause, length of time in seconds                                                              |
| _              | <i>Pipe and underscore</i> : beginning of an overlapping talk of two or more people; also marker of a rapid turn taking          |
| bad=experience | <i>Equal sign</i> : rapid repetition, contraction with no gap of silence                                                         |
| <b>no</b>      | <i>Bold</i> : accentuated speaking                                                                                               |
| MAY BE         | <i>Capitals</i> : loud talk                                                                                                      |
| 'may be'       | <i>Single quotations marks</i> : quiet talk                                                                                      |
| noooo          | <i>Attached vowels</i> : drawl; the more vowels attached, the longer the drawl                                                   |
| becau-         | <i>Hyphen</i> : break-up                                                                                                         |
| b e c a u s e  | <i>Spaces between the letters</i> : slow talk                                                                                    |
| ?              | <i>Question mark</i> : distinct raise of the voice                                                                               |
| .              | <i>Point</i> : Distinct climb down                                                                                               |
| ((laughing))   | <i>Filled double parentheses</i> : commentary of the transcriptionist to an event, sound, detail, that is not easily transcribed |
| /              | <i>Slash</i> : beginning and length of the commented phenomenon                                                                  |
| (sure)         | <i>Filled single parentheses</i> : doubt about the spoken words                                                                  |
| ( )            | <i>Empty single parentheses</i> : speech is not to decode; the length of the parentheses shows the length of the speech          |
| //mhm//        | <i>Double slashes</i> : short reaction of the interviewer; external (third) persons are signed as //EP: mhm//                    |
