# Supplementary material for: Meaning of living with severe chronic obstructive lung disease: a qualitative study
Source: PubMed Central journal article supplement — BMJ Open. 2016 Dec 8;6(12):e011555. doi: 10.1136/bmjopen-2016-011555 (PMC5168631; doi:10.1136/bmjopen-2016-011555), 2016-12-08
Supplement: bmjopen-2016-011555supp2.pdf [file bmjopen-2016-011555supp2.pdf]

## Coding tree

### (The meaning of living with severe chronic obstructive lung disease: a qualitative study)

| Main Categories                                               | Codes                                                                                            |                                                                                                      |
|---------------------------------------------------------------|--------------------------------------------------------------------------------------------------|------------------------------------------------------------------------------------------------------|
| Stigma COPD                                                   | CC: Acknowledging personal responsibility for illness                                            |                                                                                                      |
|                                                               | C: Visibility of disease (oxygen device)                                                         |                                                                                                      |
|                                                               | AS: Look for causes of COPD                                                                      |                                                                                                      |
|                                                               | CQ: Open handling of disease                                                                     | Fighting against the disease                                                                         |
|                                                               | CQ: Confronting oneself and others with disease                                                  | Consciousness of being ill<br>Consciousness of being at the end of life<br>Acceptance of the disease |
|                                                               | CQ: Denying responsibility                                                                       |                                                                                                      |
| Increased social isolation                                    | CC: Restriction of mobility                                                                      |                                                                                                      |
|                                                               | CC: Physical complaints / limitations                                                            | Headaches<br>Breathlessness<br>Speaking is strenuous                                                 |
|                                                               | C: Being dependent on support                                                                    |                                                                                                      |
|                                                               | AS: Outbreak of social isolation                                                                 | Contact with self-help group                                                                         |
|                                                               | CQ: Need for attention                                                                           |                                                                                                      |
| Insidious decline conveys only a gradual feeling of being ill | CC: Routine during crises gives the feeling of general routine                                   | Treatment outside the crisis routine                                                                 |
|                                                               | CC: Progressive course                                                                           |                                                                                                      |
|                                                               | CQ: Lack of feeling ill                                                                          |                                                                                                      |
|                                                               | C: Fear of what might come                                                                       |                                                                                                      |
|                                                               | C: Social integration                                                                            |                                                                                                      |
|                                                               | AS: Slow implementation of care                                                                  |                                                                                                      |
|                                                               | AS: Using one's own initiative in influencing the disease?                                       | Change of lifestyle<br>Own initiative in medical care                                                |
|                                                               | AS: Delaying medical interventions                                                               |                                                                                                      |
| CQ: Hardly any confrontation with one's own mortality         | Depressive attitude / resignation                                                                |                                                                                                      |
| Disease as a factor that determines everyday life (Dominance) | CC: Physical complaints / limitations                                                            |                                                                                                      |
|                                                               | C: Being dependent on support                                                                    |                                                                                                      |
|                                                               | AS: Social withdrawal                                                                            |                                                                                                      |
|                                                               | CQ: Monotony                                                                                     |                                                                                                      |
| Uncertain feeling of being ill                                | CC: What does COPD mean) (finding the right treatment)                                           | "and at that time, nobody knew what COPD was"                                                        |
|                                                               | CC: Perception of physical signals and ability                                                   |                                                                                                      |
|                                                               | C: Convalescence                                                                                 |                                                                                                      |
|                                                               | AS: "There's nothing else wrong with me" (healthy interpretation of one's own disease situation) |                                                                                                      |
|                                                               | CQ: Trivialisation                                                                               |                                                                                                      |
|                                                               | CQ: Trusting (having to trust) conventional medicine                                             |                                                                                                      |

|                                                  |                                                                                                        |                                                                                                                                                                                                        |
|--------------------------------------------------|--------------------------------------------------------------------------------------------------------|--------------------------------------------------------------------------------------------------------------------------------------------------------------------------------------------------------|
| Trusting (having to trust) conventional medicine | CC: Hope of a cure / optimism for an improvement to the general condition                              |                                                                                                                                                                                                        |
|                                                  | C: Convalescence / positive experience of care                                                         |                                                                                                                                                                                                        |
|                                                  | C: Knowledge about the disease / treatment (also one's own disease experiences)                        |                                                                                                                                                                                                        |
|                                                  | C: Setbacks in treatment                                                                               |                                                                                                                                                                                                        |
|                                                  | C: Perceived errors in medical care                                                                    | Communication not patient-appropriate<br>Negative experience with professional care<br>Dissatisfaction with the clinical care                                                                          |
|                                                  | AS: Decision to avail of conventional medical competencies                                             | Coordination of medical aids and processes                                                                                                                                                             |
|                                                  | CQ: Treatment problems create fear                                                                     |                                                                                                                                                                                                        |
|                                                  | CQ: Stability of the general condition enables one to avoid confronting the seriousness of the illness |                                                                                                                                                                                                        |
| Maintenance of normality                         | CC: Need for independence                                                                              | Freedom of movement in home environment                                                                                                                                                                |
|                                                  | C: Control of symptoms                                                                                 | Own ability to influence the illness                                                                                                                                                                   |
|                                                  | AS: Exhausting physical limits                                                                         |                                                                                                                                                                                                        |
|                                                  | CQ: Optimism / hope (of a cure)                                                                        |                                                                                                                                                                                                        |
|                                                  | CQ: Trivialisation                                                                                     | ... as a strategy<br>... of the severity of the illness<br>... of the symptoms<br>... of the symptoms by relatives                                                                                     |
|                                                  | CQ: Emotional separation                                                                               |                                                                                                                                                                                                        |
|                                                  | CQ: Optimism / hope of a cure and an improvement to the general condition                              | Active hope<br>Passive hope<br>Hope of a cure with conventional medicine                                                                                                                               |
| Being dependent on support                       | CC: The body can no longer manage                                                                      | Powerlessness<br>Omnipresence of the disease<br>Frequent rests required during the course of the day                                                                                                   |
|                                                  | C: Limitation due to (medicinal) side effects and symptoms                                             | Environmental factors / air conditions influence the symptoms<br>Physical reserves of energy decline<br>Speaking is strenuous<br>Constipation<br>Nocturnal restlessness<br>Breathlessness<br>Headaches |
|                                                  | AS: Restructuring of everyday life (redistribution of tasks)                                           | Change in social roles<br>Responsibility of the families                                                                                                                                               |
|                                                  | CQ: Dependency on personal (carer) and technical support (technical aids)                              | Medical home visits are necessary                                                                                                                                                                      |
|                                                  | CQ: Functional and social dependency                                                                   | Support with<br>... meals<br>... daily motivation<br>... personal hygiene<br>Underlying family conflicts                                                                                               |
|                                                  | CQ: Increase in social isolation                                                                       |                                                                                                                                                                                                        |
